# Supplementary material for: Healthy Lives 5 Axis Scale for Individuals with Complex Health and Social Needs: Assessment of Validity and Reliability
Source: Research Square preprint supplement (doi:10.21203/rs.3.rs-4622955/v1), 2024-07-19
Supplement: Supplementary file 1 [file b1a05a707198e36a94fabd5d.pdf]

# Table 5: Healthy Lives™ 5-Axis Scale

Directions: Use average rating for prior three months unless otherwise noted. For each category, please circle the number that best describes the patient and enter total score for each axis in box.

|               |  |            |  |                         |  |
|---------------|--|------------|--|-------------------------|--|
| Patient Name: |  | Scored by: |  | Date of Administration: |  |
|---------------|--|------------|--|-------------------------|--|

  

|                                                     |                                                                                                                                                                     |               |                                                                                                                                                                                          |   |                                                                                           |
|-----------------------------------------------------|---------------------------------------------------------------------------------------------------------------------------------------------------------------------|---------------|------------------------------------------------------------------------------------------------------------------------------------------------------------------------------------------|---|-------------------------------------------------------------------------------------------|
| Circle rating                                       |                                                                                                                                                                     | Circle rating |                                                                                                                                                                                          |   |                                                                                           |
|                                                     | <b>Medical Problems</b>                                                                                                                                             |               | <b>Behavioral Health / Substance Abuse / Developmental Disabilities</b>                                                                                                                  |   | <b>Health Related Functioning: Medical and Behavioral</b>                                 |
| 4                                                   | No symptoms or mild, transient symptoms of medical conditions                                                                                                       | 4             | None or only mild symptoms of psychiatric disorder or substance abuse                                                                                                                    |   |                                                                                           |
| 3                                                   | Mild but persistent symptoms, which do not interfere with current functioning (e.g., mobility, self-care, work, study, family or leisure activities)                | 3             | Mild but persistent psychiatric disorder and/or substance abuse symptoms that do not interfere with current functioning (e.g., mobility, self-care, work, family, or leisure activities) | + | = <div style="border: 1px solid black; width: 40px; height: 40px; margin: 0 auto;"></div> |
| 2                                                   | Moderate to severe symptoms, which interfere with one or more aspect of current functioning (e.g., mobility, self-care, work, study, family, or leisure activities) | 2             | Moderate psychiatric disorder and/or substance abuse which interfere with one or more area of functioning                                                                                | = |                                                                                           |
| 1                                                   | Severe symptoms causing permanent disability and/or inability to function in several areas                                                                          | 1             | Serious psychiatric disorder and/or substance abuse resulting in permanent disability and/or need for residential care                                                                   |   |                                                                                           |
|                                                     | <b>Basic Physical/Environmental Needs</b>                                                                                                                           |               | <b>Psychosocial Needs</b>                                                                                                                                                                |   | <b>Basic Needs:</b>                                                                       |
| 4                                                   | Stable and adequate housing and/or nutrition, living independently with minimal support                                                                             | 4             | Frequent contact with family, friends, and/or acquaintances, who reliably provide support when needed                                                                                    |   |                                                                                           |
| 3                                                   | Stable and adequate housing and/or nutrition but needs frequent (>1x/week) support from others (e.g. family, home care, or an institutional setting)                | 3             | Regular contact with family, friends, and/or acquaintances, who are not reliable sources of support                                                                                      |   |                                                                                           |
| 2                                                   | Unstable housing and/or nutrition, inadequate support at home or living in a shelter                                                                                | 2             | Occasional contact with family, friends, and/or acquaintances but they provide very limited assistance with needs                                                                        | + | = <div style="border: 1px solid black; width: 40px; height: 40px; margin: 0 auto;"></div> |
| 1                                                   | Homeless, no access to regular food, unsafe environment                                                                                                             | 1             | No assistance readily available from family, friends, and/or acquaintances                                                                                                               | = |                                                                                           |
|                                                     | <b>Adherence to Medications and Recommendations</b>                                                                                                                 |               | <b>Self-Care/Activation</b>                                                                                                                                                              |   | <b>Self-Care</b>                                                                          |
| 4                                                   | Excellent adherence, takes nearly all (>90%) of prescribed doses/treatments and follows through on most recommendations and referrals                               | 4             | Pt can identify goals, has solid understanding of illness, is actively practicing skills and/or has successfully made changes                                                            |   |                                                                                           |
| 3                                                   | Good adherence, consistently takes approximately three quarters (60--90%) of prescribed doses and follows through on over half of recommendations/referrals         | 3             | Has some understanding of health issues with difficulty setting realistic goals; is trying to make changes in life style                                                                 | + | = <div style="border: 1px solid black; width: 40px; height: 40px; margin: 0 auto;"></div> |
| 2                                                   | Fair adherence: Adherence to medications, treatments and referrals is about 50%,                                                                                    | 2             | Has some information but with large gaps in understanding, believing health is largely out of his/her control, low motivation to change                                                  | = |                                                                                           |
| 1                                                   | Poor or very poor adherence, takes less than a third (<40%) of prescribed doses, and usually does not follow through on recommendations, treatments or referrals    | 1             | Pt is passive and demoralized, lacking motivation or actively resisting change; has little accurate information about his/her health                                                     |   |                                                                                           |
|                                                     | <b>Availability of Healthcare &amp; Resources</b>                                                                                                                   |               | <b>Relationship with Providers</b>                                                                                                                                                       |   | <b>Access to Care</b>                                                                     |
| 4                                                   | Good access to primary and behavioral healthcare                                                                                                                    | 4             | Positive relationships with most healthcare professionals                                                                                                                                |   |                                                                                           |
| 3                                                   | Access somewhat limited due to barriers such as inadequate insurance, linguistic or cultural barriers, lack of transportation, or lack of providers                 | 3             | Neutral or formal relationships with healthcare professionals, occasional difficulties communicating                                                                                     |   | = <div style="border: 1px solid black; width: 40px; height: 40px; margin: 0 auto;"></div> |
| 2                                                   | Access very limited due to multiple barriers, such as inadequate insurance, linguistic or cultural issues, lack of transportation, or lack of providers             | 2             | Relationship with providers distant or moderately negative, with persistent difficulties communicating                                                                                   | + |                                                                                           |
| 1                                                   | No adequate access to care                                                                                                                                          | 1             | Largely negative relationship with primary care providers, including frequent conflicts during appointments or complaints to third parties                                               | = |                                                                                           |
|                                                     | <b>ED Hospital Utilization</b>                                                                                                                                      |               | <b>Primary Care Utilization</b>                                                                                                                                                          |   | <b>Utilization of Health Care</b>                                                         |
| 4                                                   | 0-2 ED visits/hospitalizations in the past year, for appropriate problems                                                                                           | 4             | Regular follow-up with PCP (attends almost all scheduled appointment)                                                                                                                    |   |                                                                                           |
| 3                                                   | 2-4 ED Visits -hospitalizations in past year                                                                                                                        | 3             | Some missed appointments                                                                                                                                                                 |   | = <div style="border: 1px solid black; width: 40px; height: 40px; margin: 0 auto;"></div> |
| 2                                                   | 4+ ED Visits/hosp'ns, less than half are avoidable                                                                                                                  | 2             | Frequent missed appointment and lack of follow-up                                                                                                                                        | + |                                                                                           |
| 1                                                   | 4+ ED Visits/hosp'ns, more than half are avoidable                                                                                                                  | 1             | No regular contact with PCP                                                                                                                                                              | = |                                                                                           |
|                                                     |                                                                                                                                                                     |               |                                                                                                                                                                                          |   |                                                                                           |
| <b>TOTAL SCORE: (add values of the boxes above)</b> |                                                                                                                                                                     |               |                                                                                                                                                                                          |   | = <div style="border: 1px solid black; width: 40px; height: 40px; margin: 0 auto;"></div> |
